# Supplementary material
Source: PubMed Central journal article supplement (PMC6754790)
Supplement: NIHMS1538062-supplement-1.pdf [file NIHMS1538062-supplement-1.pdf]

**Figure S1.** Directed acyclic graph of potential confounders in the analysis of prenatal urinary phthalate metabolites and preterm birth.

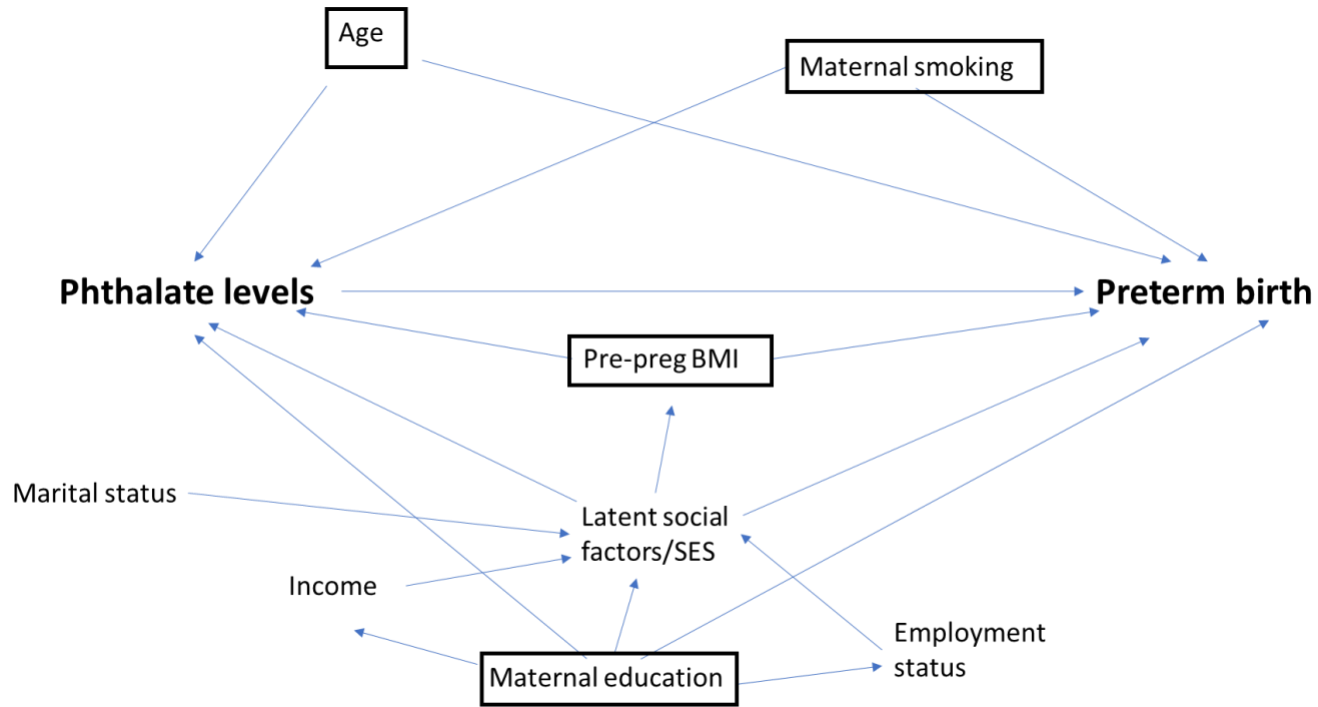

Note: Variables with boxes around them indicate variables on open backdoor paths that were further considered as confounders in our data.

**Table S1.** Pearson correlation coefficients between specific gravity-corrected pregnancy averages of urinary phthalate and phthalate alternative metabolites.

|               | MEP  | MBP   | MBzP | MiBP | $\Sigma$ DEHP | MCPP | MCOP | MCNP | MHBP  | MHiBP | MECPTP | MEHHTP | MONP |
|---------------|------|-------|------|------|---------------|------|------|------|-------|-------|--------|--------|------|
| MEP           | 1.00 |       |      |      |               |      |      |      |       |       |        |        |      |
| MBP           | 0.26 | 1.00  |      |      |               |      |      |      |       |       |        |        |      |
| MBzP          | 0.15 | 0.53  | 1.00 |      |               |      |      |      |       |       |        |        |      |
| MiBP          | 0.22 | 0.61  | 0.38 | 1.00 |               |      |      |      |       |       |        |        |      |
| $\Sigma$ DEHP | 0.20 | 0.53  | 0.41 | 0.42 | 1.00          |      |      |      |       |       |        |        |      |
| MCPP          | 0.16 | 0.42  | 0.35 | 0.31 | 0.54          | 1.00 |      |      |       |       |        |        |      |
| MCOP          | 0.12 | 0.22  | 0.23 | 0.21 | 0.45          | 0.74 | 1.00 |      |       |       |        |        |      |
| MCNP          | 0.09 | 0.17  | 0.21 | 0.23 | 0.39          | 0.58 | 0.68 | 1.00 |       |       |        |        |      |
| MHBP          | 0.19 | 0.81  | 0.47 | 0.51 | 0.41          | 0.41 | 0.17 | 0.12 | 1.00  |       |        |        |      |
| MHiBP         | 0.23 | 0.56  | 0.34 | 0.89 | 0.37          | 0.34 | 0.20 | 0.22 | 0.63  | 1.00  |        |        |      |
| MECPTP        | 0.04 | -0.02 | 0.01 | 0.02 | 0.06          | 0.11 | 0.18 | 0.24 | -0.03 | -0.02 | 1.00   |        |      |
| MEHHTP        | 0.04 | 0.02  | 0.02 | 0.04 | 0.12          | 0.15 | 0.15 | 0.20 | 0.02  | 0.02  | 0.92   | 1.00   |      |
| MONP          | 0.11 | 0.31  | 0.26 | 0.31 | 0.42          | 0.57 | 0.79 | 0.32 | 0.29  | 0.25  | 0.22   | 0.24   | 1.00 |

Abbreviations: monoethyl phthalate (MEP); mono-*n*-butyl phthalate (MBP); monobenzyl phthalate (MBzP); mono-isobutyl phthalate (MiBP); di(2-ethylhexyl) phthalate (DEHP); mono-3-carboxypropyl phthalate (MCPP); mono carboxyisooctyl phthalate (MCOP); mono carboxyisononyl phthalate (MCNP); mono-3-hydroxybutyl phthalate (MHBP); mono-2-hydroxyisobutyl phthalate (MHiBP); mono-2-ethyl-5-carboxypentyl terephthalate (MECPTP); mono-2-ethylhydroxyhexyl terephthalate (MEHHTP); 4-methyl-7-oxo-octyl phthalate (MONP).

**Table S2.** Geometric means of specific gravity-corrected pregnancy-average phthalate and phthalate alterative metabolite concentrations stratified by demographic characteristics in the PROTECT cohort (ng/mL or nmol/mL for  $\Sigma$ DEHP).

|                                             | MEP          | MBP          | MBzP        | MiBP         | $\Sigma$ DEHP | MCPP        | MCOP         | MCNP        | MHBP        | MHiBP       | MECPTP       | MEHHTP       | MONP |
|---------------------------------------------|--------------|--------------|-------------|--------------|---------------|-------------|--------------|-------------|-------------|-------------|--------------|--------------|------|
| <b>Age (years)</b>                          |              |              |             |              |               |             |              |             |             |             |              |              |      |
| 18-24 (ref.)                                | 39.88        | 18.61        | 3.79        | 11.34        | 0.11          | 1.52        | 10.62        | 1.78        | 1.59        | 4.88        | 19.93        | 3.45         | 2.11 |
| 25-29                                       | 41.87        | <b>13.12</b> | <b>2.38</b> | <b>9.14</b>  | <b>0.09</b>   | <b>1.27</b> | 10.23        | 1.68        | <b>1.17</b> | <b>4.04</b> | <b>28.43</b> | <b>4.57</b>  | 1.84 |
| 30-34                                       | <b>59.65</b> | <b>13.35</b> | <b>2.23</b> | <b>9.09</b>  | <b>0.10</b>   | <b>1.31</b> | 11.39        | <b>1.98</b> | <b>1.30</b> | <b>3.90</b> | <b>33.46</b> | <b>5.60</b>  | 2.08 |
| >35                                         | 45.63        | <b>12.94</b> | <b>2.15</b> | <b>9.72</b>  | <b>0.10</b>   | 1.38        | 11.29        | 1.81        | <b>1.20</b> | 4.27        | <b>39.20</b> | <b>6.55</b>  | 2.10 |
| <b>Education</b>                            |              |              |             |              |               |             |              |             |             |             |              |              |      |
| <High school (ref.)                         | 48.18        | 21.48        | 3.91        | 12.42        | 0.12          | 1.65        | 9.36         | 1.66        | 1.84        | 5.95        | 12.87        | 2.44         | 1.59 |
| High school/equivalent                      | 34.19        | 19.91        | 4.83        | 12.22        | 0.11          | 1.61        | 9.25         | 1.77        | 1.75        | 5.00        | 15.96        | 2.63         | 2.29 |
| Some college                                | 44.07        | <b>16.08</b> | <b>2.89</b> | 10.32        | 0.11          | 1.42        | 11.19        | 1.79        | 1.46        | <b>4.48</b> | <b>24.99</b> | 4.22         | 1.90 |
| College degree                              | 47.82        | <b>12.42</b> | <b>2.17</b> | <b>8.90</b>  | <b>0.09</b>   | <b>1.26</b> | 11.04        | 1.83        | <b>1.14</b> | <b>3.92</b> | <b>35.27</b> | <b>5.82</b>  | 2.07 |
| <b>Income</b>                               |              |              |             |              |               |             |              |             |             |             |              |              |      |
| <20k (ref.)                                 | 40.41        | 16.50        | 3.25        | 10.55        | 0.10          | 1.35        | 9.49         | 1.67        | 1.50        | 4.65        | 20.01        | 3.56         | 1.88 |
| 20-40k                                      | 43.49        | <b>13.30</b> | <b>2.32</b> | <b>9.16</b>  | 0.10          | 1.27        | 10.59        | 1.79        | <b>1.21</b> | 4.07        | <b>30.53</b> | <b>4.78</b>  | 1.94 |
| >40k                                        | <b>51.73</b> | <b>12.73</b> | <b>2.20</b> | <b>9.17</b>  | 0.10          | 1.44        | <b>12.72</b> | <b>2.02</b> | <b>1.16</b> | <b>3.96</b> | <b>44.36</b> | <b>7.22</b>  | 2.18 |
| <b>Marital status</b>                       |              |              |             |              |               |             |              |             |             |             |              |              |      |
| Single (ref.)                               | 53.53        | 17.39        | 3.32        | 11.03        | 0.11          | 1.51        | 10.40        | 1.74        | 1.53        | 4.89        | 23.10        | 3.92         | 1.96 |
| Married/cohabitating                        | <b>42.82</b> | <b>14.34</b> | <b>2.62</b> | <b>9.68</b>  | 0.10          | 1.34        | 10.79        | 1.80        | <b>1.30</b> | 4.21        | 28.45        | 4.75         | 2.01 |
| <b>Pre-pregnancy BMI (kg/m<sup>2</sup>)</b> |              |              |             |              |               |             |              |             |             |             |              |              |      |
| <18.5 (ref.)                                | 37.55        | 14.38        | 2.99        | 9.30         | 0.10          | 1.28        | 9.33         | 1.65        | 1.42        | 4.22        | 21.31        | 4.09         | 2.17 |
| 18.5-24.9                                   | 41.67        | 13.48        | 2.44        | 9.50         | 0.10          | 1.29        | 10.62        | 1.75        | 1.22        | 4.12        | 28.33        | 4.56         | 1.81 |
| 25-29.9                                     | 49.46        | 15.40        | 2.97        | 9.52         | 0.10          | 1.45        | 10.91        | 1.85        | 1.38        | 4.33        | 27.80        | 4.46         | 2.07 |
| >30                                         | 50.84        | <b>18.47</b> | 3.15        | <b>12.43</b> | <b>0.11</b>   | 1.57        | 11.93        | 1.92        | 1.58        | 5.19        | 29.59        | 5.38         | 2.28 |
| <b>Employment status</b>                    |              |              |             |              |               |             |              |             |             |             |              |              |      |
| Employed (ref.)                             | 45.30        | 13.19        | 2.33        | 9.13         | 0.10          | 1.30        | 11.09        | 1.82        | 1.20        | 3.99        | 32.46        | 5.40         | 1.99 |
| Unemployed                                  | 43.76        | <b>18.53</b> | <b>3.64</b> | <b>11.50</b> | <b>0.11</b>   | <b>1.50</b> | 10.01        | 1.74        | <b>1.67</b> | <b>5.04</b> | <b>18.67</b> | <b>3.13</b>  | 2.06 |
| <b>Smoking</b>                              |              |              |             |              |               |             |              |             |             |             |              |              |      |
| Never (ref.)                                | 43.19        | 14.54        | 2.67        | 9.78         | 0.10          | 1.36        | 10.70        | 1.79        | 1.32        | 4.25        | 27.18        | 4.50         | 1.99 |
| Ever                                        | 52.20        | <b>17.22</b> | <b>3.24</b> | 10.53        | <b>0.12</b>   | 1.45        | 10.67        | 1.77        | 1.53        | 4.87        | 27.26        | 4.95         | 2.05 |
| Current                                     | 59.41        | 16.67        | 2.44        | 13.96        | 0.12          | 1.68        | 13.07        | 2.16        | 1.20        | 4.79        | <b>82.74</b> | <b>12.91</b> | 2.53 |
| <b>Alcohol use in pregnancy</b>             |              |              |             |              |               |             |              |             |             |             |              |              |      |
| None (ref.)                                 | 44.19        | 14.74        | 2.71        | 9.87         | 0.10          | 1.35        | 10.63        | 1.78        | 1.32        | 4.31        | 27.51        | 4.56         | 2.01 |
| Any                                         | 52.41        | 16.84        | 3.13        | 9.96         | 0.11          | <b>1.72</b> | 12.05        | 2.01        | 1.59        | 4.30        | 31.27        | 5.77         | 1.92 |
| <b>Newborn sex</b>                          |              |              |             |              |               |             |              |             |             |             |              |              |      |
| Female (ref.)                               | 44.03        | 14.92        | 2.77        | 9.54         | 0.10          | 1.43        | 11.26        | 1.79        | 1.33        | 4.24        | 28.13        | 4.63         | 1.94 |
| Male                                        | 45.61        | 14.82        | 2.69        | 10.28        | 0.10          | 1.33        | 10.27        | 1.79        | 1.34        | 4.37        | 27.67        | 4.68         | 2.07 |
| <b>Preterm</b>                              |              |              |             |              |               |             |              |             |             |             |              |              |      |
| No (ref.)                                   | 44.76        | 14.54        | 2.70        | 9.75         | 0.10          | 1.36        | 10.69        | 1.78        | 1.31        | 4.22        | 28.93        | 4.79         | 2.02 |
| Yes                                         | 43.83        | <b>18.66</b> | 3.06        | <b>12.00</b> | 0.10          | 1.55        | 11.01        | 1.88        | <b>1.63</b> | <b>5.34</b> | <b>18.88</b> | <b>3.33</b>  | 1.87 |

Differences from reference category p<0.05 are bolded. Abbreviations: monoethyl phthalate (MEP); mono-*n*-butyl phthalate (MBP); monobenzyl phthalate (MBzP); mono-isobutyl phthalate (MiBP); di(2-ethylhexyl) phthalate (DEHP); mono-3-carboxypropyl phthalate (MCPP); mono carboxyisooctyl phthalate (MCOP); mono carboxyisononyl phthalate (MCNP); mono-3-hydroxybutyl phthalate (MHBP); mono-2-hydroxyisobutyl phthalate (MHiBP); mono-2-ethyl-5-carboxypentyl terephthalate (MECPTP); mono-2-ethylhydroxyhexyl terephthalate (MEHHTP); 4-methyl-7-oxo-octyl phthalate (MONP)

**Table S3.** Adjusted<sup>a</sup> odds ratios (95% confidence intervals) for an interquartile range difference in urinary phthalate or phthalate alternative metabolite concentrations and preterm birth by study visit.

|                   | Visit 1                  | Visit 2                  | Visit 3           |
|-------------------|--------------------------|--------------------------|-------------------|
| n (preterm, term) | 70, 793                  | 78, 805                  | 64, 605           |
| MEP               | 0.99 (0.73, 1.35)        | 0.98 (0.73, 1.30)        | 1.06 (0.78, 1.45) |
| MBP               | 1.11 (0.82, 1.49)        | <b>1.38 (1.05, 1.81)</b> | 1.15 (0.84, 1.59) |
| MBzP              | 1.08 (0.82, 1.43)        | 1.10 (0.84, 1.43)        | 1.11 (0.82, 1.51) |
| MiBP              | 1.19 (0.90, 1.59)        | <b>1.34 (1.02, 1.76)</b> | 1.21 (0.89, 1.65) |
| ∑DEHP             | 0.87 (0.65, 1.16)        | 1.02 (0.78, 1.33)        | 0.92 (0.68, 1.24) |
| M CPP             | 1.08 (0.84, 1.39)        | 1.07 (0.83, 1.37)        | 1.05 (0.82, 1.34) |
| MCOP              | 1.04 (0.81, 1.35)        | 1.04 (0.81, 1.34)        | 1.01 (0.77, 1.32) |
| MCNP              | 0.97 (0.77, 1.22)        | 1.12 (0.91, 1.38)        | 1.12 (0.89, 1.42) |
| n (preterm, term) | 55, 585                  | 58, 582                  | 46, 437           |
| MHBP              | 1.13 (0.82, 1.57)        | <b>1.53 (1.11, 2.10)</b> | 1.03 (0.73, 1.46) |
| MHiBP             | 1.16 (0.81, 1.67)        | <b>1.84 (1.27, 2.67)</b> | 1.39 (0.92, 2.09) |
| n (preterm, term) | 30, 324                  | 32, 337                  | 25, 270           |
| MECPTP            | <b>0.52 (0.31, 0.87)</b> | 0.74 (0.48, 1.14)        | 1.13 (0.78, 1.65) |
| MEHHTP            | <b>0.58 (0.35, 0.95)</b> | 0.73 (0.46, 1.16)        | 1.22 (0.81, 1.84) |
| MONP              | 0.82 (0.55, 1.20)        | 0.87 (0.61, 1.23)        | 0.97 (0.67, 1.41) |

<sup>a</sup>Adjusted for maternal age (continuous), education (4 level ordinal variable), gestational age at urine sample collection, and specific gravity. Associations with p value <0.05 are bolded. Median (range) gestational age in weeks at sample collection by visit was as follows: visit 1=17.6 (16.6, 19.3); visit 2=23.4 (22.0, 25.1); visit 3=27.6 (25.9, 30.3). Abbreviations: monoethyl phthalate (MEP); mono-*n*-butyl phthalate (MBP); monobenzyl phthalate (MBzP); mono-isobutyl phthalate (MiBP); di(2-ethylhexyl) phthalate (DEHP); mono-3-carboxypropyl phthalate (M CPP); mono carboxyisooctyl phthalate (MCOP); mono carboxyisononyl phthalate (MCNP); mono-3-hydroxybutyl phthalate (MHBP); mono-2-hydroxyisobutyl phthalate (MHiBP); mono-2-ethyl-5-carboxypentyl terephthalate (MECPTP); mono-2-ethylhydroxyhexyl terephthalate (MEHHTP); 4-methyl-7-oxo-octyl phthalate (MONP).

**Table S4.** Crude<sup>a</sup> associations (95% confidence intervals) between an interquartile range difference in urinary phthalate or phthalate alternative metabolite concentrations and gestational age at birth (days).

|            | Visit 1                     | Visit 2                     | Visit 3                     | Pregnancy average           |
|------------|-----------------------------|-----------------------------|-----------------------------|-----------------------------|
| Metabolite | B (95% CI)                  | B (95% CI)                  | B (95% CI)                  | B (95% CI)                  |
| n          | 882                         | 895                         | 681                         | 1090                        |
| MEP        | 0.25 (-0.85, 1.35)          | 0.31 (-0.78, 1.39)          | 0.32 (-0.87, 1.50)          | 0.70 (-0.50, 1.90)          |
| MBP        | -0.88 (-1.91, 0.16)         | <b>-1.60 (-2.59, -0.61)</b> | <b>-1.38 (-2.53, -0.23)</b> | <b>-2.02 (-3.11, -0.93)</b> |
| MBzP       | <b>-1.01 (-2.00, -0.01)</b> | <b>-1.34 (-2.35, -0.34)</b> | -0.97 (-2.11, 0.18)         | <b>-1.42 (-2.48, -0.37)</b> |
| MiBP       | <b>-1.04 (-2.06, -0.01)</b> | <b>-1.05 (-2.09, -0.01)</b> | <b>-1.50 (-2.65, -0.35)</b> | <b>-1.53 (-2.60, -0.46)</b> |
| ∑DEHP      | 0.37 (-0.62, 1.35)          | -0.61 (-1.60, 0.36)         | -0.09 (-1.17, 0.98)         | -0.37 (-1.49, 0.75)         |
| M CPP      | -0.66 (-1.56, 0.25)         | -0.65 (-1.59, 0.28)         | -0.31 (-1.25, 0.62)         | <b>-1.12 (-2.14, -0.10)</b> |
| MCOP       | -0.09 (-0.99, 0.81)         | -0.37 (-1.32, 0.58)         | 0.22 (-0.79, 1.22)          | -0.45 (-1.52, 0.63)         |
| MCNP       | 0.08 (-0.74, 0.89)          | -0.43 (-1.25, 0.38)         | -0.25 (-1.14, 0.65)         | -0.48 (-1.53, 0.56)         |
| n          | 653                         | 651                         | 490                         | 827                         |
| MHBP       | -1.20 (-2.42, 0.03)         | <b>-1.97 (-3.20, -0.75)</b> | -1.21 (-2.49, 0.06)         | <b>-2.23 (-3.48, -0.98)</b> |
| MHiBP      | -1.09 (-2.45, 0.27)         | <b>-1.90 (-3.31, -0.50)</b> | <b>-2.09 (-3.59, -0.60)</b> | <b>-1.86 (-3.22, -0.49)</b> |
| n          | 363                         | 377                         | 299                         | 428                         |
| MECPTP     | <b>2.10 (0.76, 3.44)</b>    | 0.60 (-0.74, 1.94)          | 1.14 (-0.22, 2.50)          | <b>2.29 (0.70, 3.88)</b>    |
| MEHHTP     | <b>1.87 (0.41, 3.32)</b>    | 1.06 (-0.38, 2.51)          | 1.30 (-0.18, 2.78)          | <b>2.28 (0.61, 3.95)</b>    |
| MONP       | 0.01 (-1.31, 1.34)          | 0.14 (-1.04, 1.32)          | 0.01 (-1.30, 1.32)          | -0.64 (-2.34, 1.07)         |

<sup>a</sup>Pregnancy averages are corrected for urinary specific gravity. Models for individual visits 1-3 include uncorrected phthalate or phthalate alternative metabolites and are adjusted for gestational age at urine sample collection and specific gravity. Associations with p value <0.05 are bolded. Median (range) gestational age in weeks at sample collection by visit was as follows: visit 1=17.6 (16.6, 19.3); visit 2=23.4 (22.0, 25.1); visit 3=27.6 (25.9, 30.3). Abbreviations: monoethyl phthalate (MEP); mono-*n*-butyl phthalate (MBP); monobenzyl phthalate (MBzP); mono-isobutyl phthalate (MiBP); di(2-ethylhexyl) phthalate (DEHP); mono-3-carboxypropyl phthalate (M CPP); mono carboxyisooctyl phthalate (MCOP); mono carboxyisononyl phthalate (MCNP); mono-3-hydroxybutyl phthalate (MHBP); mono-2-hydroxyisobutyl phthalate (MHiBP); mono-2-ethyl-5-carboxypentyl terephthalate (MECPTP); mono-2-ethylhydroxyhexyl terephthalate (MEHHTP); 4-methyl-7-oxo-octyl phthalate (MONP).

**Table S5.** Adjusted<sup>a</sup> associations (95% confidence intervals) between an interquartile range difference in urinary phthalate or phthalate alternative metabolite concentrations and gestational age at birth (days).

|            | Visit 1                  | Visit 2                     | Visit 3                     | Pregnancy average           |
|------------|--------------------------|-----------------------------|-----------------------------|-----------------------------|
| Metabolite | B (95% CI)               | B (95% CI)                  | B (95% CI)                  | B (95% CI)                  |
| n          | 824                      | 841                         | 637                         | 1019                        |
| MEP        | -0.04 (-1.18, 1.10)      | 0.15 (-0.96, 1.25)          | 0.51 (-0.70, 1.71)          | 0.54 (-0.69, 1.77)          |
| MBP        | -0.39 (-1.48, 0.69)      | <b>-1.18 (-2.20, -0.15)</b> | -0.86 (-2.05, 0.32)         | <b>-1.44 (-2.60, -0.27)</b> |
| MBzP       | -0.60 (-1.66, 0.46)      | -0.83 (-1.87, 0.21)         | -0.50 (-1.67, 0.67)         | -0.91 (-2.04, 0.23)         |
| MiBP       | -0.70 (-1.77, 0.36)      | -0.71 (-1.76, 0.34)         | -0.97 (-2.16, 0.21)         | -1.04 (-2.15, 0.07)         |
| ∑DEHP      | 0.72 (-0.30, 1.75)       | -0.47 (-1.48, 0.54)         | 0.38 (-0.71, 1.47)          | 0.05 (-1.13, 1.22)          |
| MCPPP      | -0.52 (-1.44, 0.41)      | -0.52 (-1.48, 0.45)         | -0.13 (-1.07, 0.81)         | -0.84 (-1.89, 0.22)         |
| MCOP       | -0.12 (-1.04, 0.81)      | -0.47 (-1.44, 0.50)         | 0.13 (-0.89, 1.14)          | -0.51 (-1.61, 0.59)         |
| MCNP       | 0.11 (-0.71, 0.94)       | -0.27 (-1.10, 0.57)         | -0.18 (-1.08, 0.72)         | -0.32 (-1.38, 0.75)         |
| n          | 603                      | 599                         | 453                         | 763                         |
| MHBP       | -0.88 (-2.19, 0.43)      | <b>-1.69 (-2.96, -0.42)</b> | -0.89 (-2.20, 0.42)         | <b>-1.85 (-3.20, -0.50)</b> |
| MHiBP      | -0.68 (-2.10, 0.75)      | <b>-1.54 (-2.97, -0.11)</b> | <b>-1.66 (-3.19, -0.12)</b> | -1.38 (-2.80, 0.04)         |
| n          | 327                      | 337                         | 274                         | 383                         |
| MECPTP     | <b>1.75 (0.29, 3.21)</b> | 0.55 (-0.90, 2.00)          | 1.09 (-0.37, 2.54)          | <b>2.14 (0.32, 3.95)</b>    |
| MEHHTP     | 1.27 (-0.34, 2.87)       | 0.99 (-0.58, 2.56)          | 1.28 (-0.31, 2.86)          | <b>1.99 (0.07, 3.91)</b>    |
| MONP       | -0.04 (-1.39, 1.31)      | -0.27 (-1.54, 1.00)         | -0.11 (-1.46, 1.23)         | -0.94 (-2.77, 0.89)         |

<sup>a</sup>Pregnancy averages are corrected for urinary specific gravity and models are additionally adjusted for maternal age (continuous), education (4 level ordinal variable), pre-pregnancy body mass index (continuous), and tobacco use (categorical). Models for individual visits 1-3 include uncorrected phthalate or phthalate alternative metabolites and are adjusted for gestational age at urine sample collection and specific gravity as well as maternal age (continuous), education (4 level ordinal variable), pre-pregnancy body mass index (continuous), and tobacco use (categorical). Associations with p value <0.05 are bolded. Median (range) gestational age in weeks at sample collection by visit was as follows: visit 1=17.6 (16.6, 19.3); visit 2=23.4 (22.0, 25.1); visit 3=27.6 (25.9, 30.3). Abbreviations: monoethyl phthalate (MEP); mono-*n*-butyl phthalate (MBP); monobenzyl phthalate (MBzP); mono-isobutyl phthalate (MiBP); di(2-ethylhexyl) phthalate (DEHP); mono-3-carboxypropyl phthalate (MCPPP); mono carboxyisooctyl phthalate (MCOP); mono carboxyisononyl phthalate (MCNP); mono-3-hydroxybutyl phthalate (MHBP); mono-2-hydroxyisobutyl phthalate (MHiBP); mono-2-ethyl-5-carboxypentyl terephthalate (MECPTP); mono-2-ethylhydroxyhexyl terephthalate (MEHHTP); 4-methyl-7-oxo-octyl phthalate (MONP).

**Table S6.** Adjusted<sup>a</sup> associations (95% confidence intervals) between an interquartile range difference in urinary phthalate or phthalate alternative metabolite concentrations and gestational age at birth (days).

| Parent | Metabolite | Visit 1                  | Visit 2                     | Visit 3             | Pregnancy average           |
|--------|------------|--------------------------|-----------------------------|---------------------|-----------------------------|
|        |            | n=863                    | n=883                       | n=669               | n=1071                      |
| DEP    | MEP        | 0.31 (-0.83, 1.46)       | 0.60 (-0.52, 1.72)          | 0.65 (-0.56, 1.87)  | 0.96 (-0.28, 2.20)          |
| DBP    | MBP        | -0.39 (-1.48, 0.69)      | <b>-1.24 (-2.26, -0.21)</b> | -0.87 (-2.06, 0.31) | <b>-1.51 (-2.67, -0.36)</b> |
| BzBP   | MBzP       | -0.46 (-1.52, 0.61)      | -0.74 (-1.79, 0.31)         | -0.41 (-1.58, 0.77) | -0.73 (-1.86, 0.41)         |
| DiBP   | MiBP       | -0.52 (-1.60, 0.55)      | -0.61 (-1.66, 0.44)         | -0.88 (-2.06, 0.31) | -0.93 (-2.04, 0.18)         |
| DEHP   | ∑DEHP      | 1.03 (-0.05, 2.11)       | -0.16 (-1.20, 0.88)         | 0.58 (-0.55, 1.71)  | 0.39 (-0.85, 1.63)          |
| DNOP   | MCPPP      | -0.32 (-1.31, 0.68)      | -0.18 (-1.18, 0.82)         | 0.27 (-0.74, 1.28)  | -0.59 (-1.75, 0.58)         |
| DiNP   | MCOP       | 0.22 (-0.77, 1.21)       | -0.04 (-1.06, 0.98)         | 0.69 (-0.40, 1.79)  | -0.03 (-1.27, 1.21)         |
|        | MCNP       | 0.30 (-0.56, 1.17)       | -0.13 (-0.97, 0.70)         | -0.02 (-0.93, 0.90) | -0.08 (-1.20, 1.04)         |
|        | n          | 640                      | 640                         | 483                 | 813                         |
| DBP    | MHBP       | -0.68 (-1.95, 0.60)      | <b>-1.54 (-2.78, -0.31)</b> | -0.97 (-2.24, 0.31) | <b>-1.83 (-3.12, -0.53)</b> |
| DiBP   | MHiBP      | -0.19 (-1.62, 1.26)      | -1.20 (-2.63, 0.23)         | -1.29 (-2.81, 0.23) | -1.05 (-2.47, 0.38)         |
|        | n          | 354                      | 369                         | 295                 | 419                         |
| DEHTP  | MECPTP     | <b>1.48 (0.09, 2.86)</b> | -0.10 (-1.47, 1.28)         | 0.45 (-0.95, 1.85)  | 1.22 (-0.49, 2.93)          |
|        | MEHHTP     | 1.13 (-0.40, 2.66)       | 0.31 (-1.20, 1.81)          | 0.54 (-0.99, 2.07)  | <b>1.02 (-0.82, 2.87)</b>   |
| DiNP   | MONP       | 0.09 (-1.22, 1.40)       | -0.21 (-1.42, 0.99)         | -0.14 (-1.46, 1.17) | -0.98 (-2.72, 0.75)         |

<sup>a</sup>Pregnancy averages are corrected for urinary specific gravity and models are additionally adjusted for maternal age (continuous) and education (4 level ordinal variable), and year of birth (nominal). Models for individual visits 1-3 include uncorrected phthalate or phthalate alternative metabolites and are additionally adjusted for gestational age at urine sample collection and specific gravity. Associations with p value <0.05 are bolded. Median (range) gestational age in weeks at sample collection by visit was as follows: visit 1=17.6 (16.6, 19.3); visit 2=23.4 (22.0, 25.1); visit 3=27.6 (25.9, 30.3). Abbreviations: diethyl phthalate (DEP); dibutyl phthalate (DBP); benzylbutyl phthalate (BzBP); diisobutyl phthalate (DiBP); di(2-ethylhexyl) phthalate (DEHP); di-n-octyl phthalate (DNOP); diisononyl phthalate (DiNP); di-2-ethyl terephthalate (DEHTP); monoethyl phthalate (MEP); mono-n-butyl phthalate (MBP); monobenzyl phthalate (MBzP); mono-isobutyl phthalate (MiBP); mono-3-carboxypropyl phthalate (MCPPP); mono carboxyisooctyl phthalate (MCOP); mono carboxyisononyl phthalate (MCNP); mono-3-hydroxybutyl phthalate (MHBP); mono-2-hydroxyisobutyl phthalate (MHiBP); mono-2-ethyl-5-carboxypentyl terephthalate (MECPTP); mono-2-ethylhydroxyhexyl terephthalate (MEHHTP); 4-methyl-7-oxo-octyl phthalate (MONP).
